# Supplementary material for: Porphyrin-lipid stabilized paclitaxel nanoemulsion for combined photodynamic therapy and chemotherapy
Source: PubMed Central journal article supplement (PMC8147067; doi:10.1186/s12951-021-00898-1), 2021-05-25
Supplement: 12951_2021_898_MOESM1_ESM.pdf [file 12951_2021_898_MOESM1_ESM.pdf]

## Supporting information

### **Porphyrin-lipid stabilized paclitaxel nanoemulsion for combined photodynamic therapy and chemotherapy**

*Enling Chang<sup>1,2</sup>, Jiachuan Bu<sup>1</sup>, Lili Ding<sup>1</sup>, Jenny W. H. Lou<sup>1,3</sup>, Michael S. Valic<sup>1,2</sup>,  
Miffy. H. Y. Cheng<sup>1</sup>, Véronique Rosilio<sup>4</sup>, Juan Chen<sup>1\*</sup>, Gang Zheng<sup>1,2,3\*</sup>*

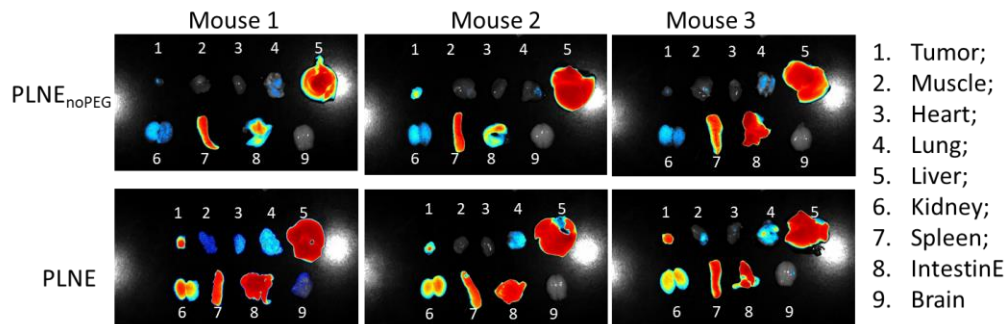

Figure S1. Ex vivo tissue fluorescence imaging at 24 h post injection of PLNE<sub>noPEG</sub> versus PLNE.

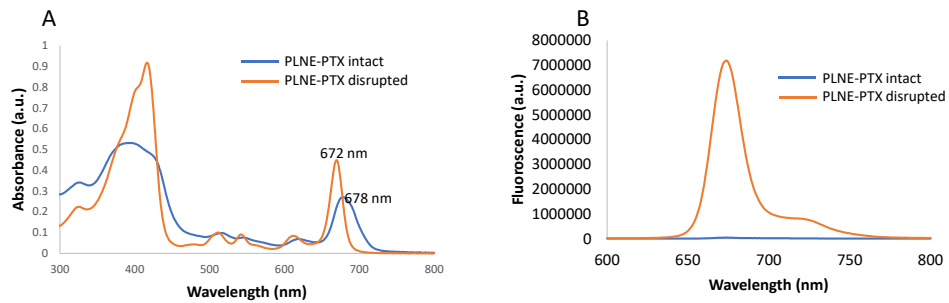

Figure S2. (A) UV-vis spectrum and (B) fluorescence spectrum of intact PLNE-PTX (ddH<sub>2</sub>O) or disrupted PLNE-PTX (ddH<sub>2</sub>O containing 1% Triton X-100).

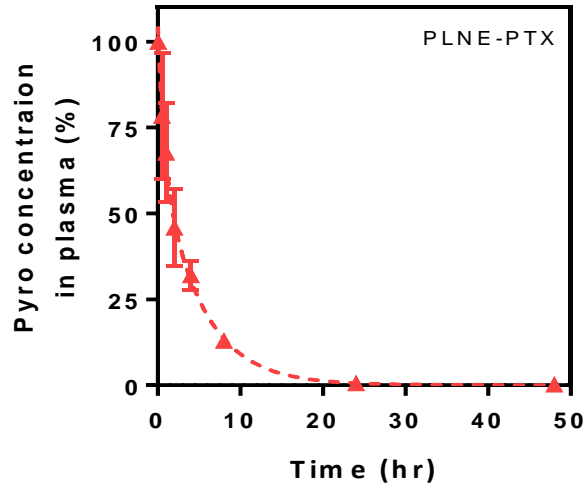

Figure S3, Blood clearance curve of PLNE-PTX exhibited short half-life of  $t_{1/2\alpha} = 0.52 \pm 0.39$  h and long half-life of  $t_{1/2\beta} = 3.10 \pm 0.34$  h (n=5) by two-phase exponential decay analysis

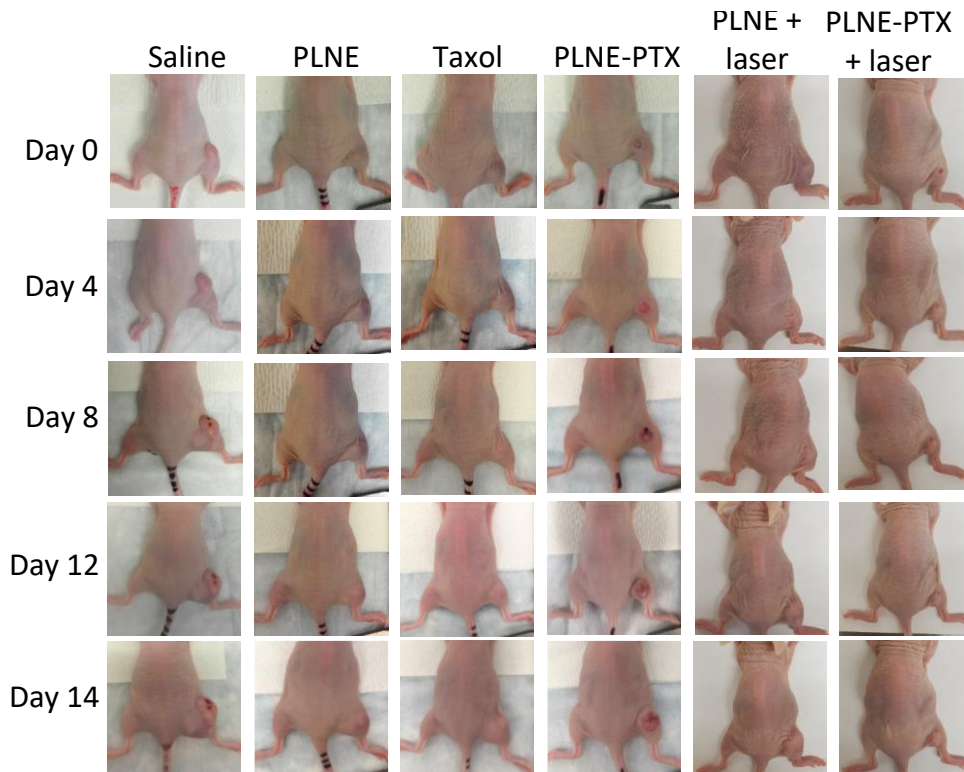

Figure S4. Representative tumor photographs in tracking tumor growth with time for each group after treatment.
